# Supplementary material for: ChIP-Seq Analysis of SlAREB1 Downstream Regulatory Network during Tomato Ripening
Source: MDPI journal article supplement (doi:10.3390/foods12122357), 2023-06-13
Supplement: s1 [file s1]

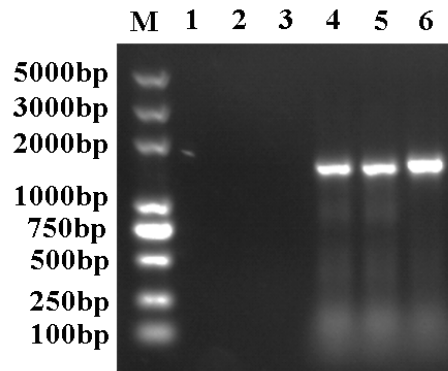

Figure S1. PCR Identification of SlAREB1 transgenic tomato plants. 1-3 were the control tomato plants, 4-5 were the transgenic tomato plants

Table S1. Primer sequences used in this study

| Gene       | Gene ID        | F-primer (5'-3')                               | R-primer (5'-3')                                       |
|------------|----------------|------------------------------------------------|--------------------------------------------------------|
| RT-SlAREB1 | Solyc04g078840 | CGGGGAAC TTTGGATTG<br>CCG                      | TGCCCATTAATCCCAGG<br>CCC                               |
| Actin      | AK328563.1     | TGTCCCTATTTACGAGG<br>GTTATGC                   | CAGTTAAATCACGACCA<br>GCAAGAT                           |
| HYG        | Flag gene      | GGAAGTGCTTGACATTG<br>GGGAG                     | CGGTGTCGTCCATCACA<br>GTTTG                             |
| SlAREB1    | Solyc04g078840 | GACACAAACTGGTCCAT<br>GGATGGTGAGCAAGGG<br>CGAGG | CTGCCGTTTCGACGATGG<br>TNACCTTACCATGGACC<br>AGTTTGTGTCC |

Table S2. Peak information statistics

| Sample     | Peak number | Total length | Average peak length |
|------------|-------------|--------------|---------------------|
| SlAREB1-IP | 972         | 373711       | 384.48              |

Table S3. Transcription factor

| Transcription factor | Number | Gene ID                                            |
|----------------------|--------|----------------------------------------------------|
| zf-HD                | 3      | Solyc03g061620.1,Solyc09g057767.1,Solyc05g019985.1 |
| FAR1                 | 3      | Solyc01g058003.1,Solyc12g038657.1,Solyc09g057880.3 |
| MADS-M-type          | 3      | Solyc00g179240.2,Solyc07g017343.1,Solyc06g034317.1 |
| C3H                  | 2      | Solyc01g014850.3,Solyc12g008890.2                  |
| SNF2                 | 2      | Solyc01g109970.3,Solyc05g044510.2                  |
| MYB                  | 2      | Solyc06g009710.3,Solyc05g013430.1                  |
| C2H2                 | 2      | Solyc04g056320.2,Solyc00g014800.1                  |
| SET                  | 1      | Solyc06g060380.3                                   |
| MYB-related          | 1      | Solyc05g013420.1                                   |
| MBF1                 | 1      | Solyc07g062400.3                                   |
| Others               | 1      | Solyc07g045185.1                                   |
| OFP                  | 1      | Solyc02g085510.1                                   |
| TRAF                 | 1      | Solyc10g079750.2                                   |
| GRAS                 | 1      | Solyc08g078800.2                                   |
| B3                   | 1      | Solyc11g045450.2                                   |
| AP2/ERF-ERF          | 1      | Solyc09g059510.3                                   |
| Jumonji              | 1      | Solyc03g097090.3                                   |
| Trihelix             | 1      | Solyc12g077540.2                                   |

Table S4. Target genes of SIAREB1

| Gene ID          | Subject length | Subject annotation                                                                          |
|------------------|----------------|---------------------------------------------------------------------------------------------|
| Solyc00g005000.3 | 202            | Eukaryotic aspartyl protease family protein                                                 |
| Solyc00g005445.1 | 198            | Cyclopropane-fatty-acyl-phospholipid synthase                                               |
| Solyc00g005907.1 | 258            | 50S ribosomal protein L16                                                                   |
| Solyc00g006660.1 | 168            | SAUR-like auxin-responsive protein family                                                   |
| Solyc00g006680.2 | 154            | Senescence-associated protein                                                               |
| Solyc00g008040.1 | 233            | alpha/beta-Hydrolases superfamily protein                                                   |
| Solyc00g008570.2 | 180            | SPA1-related 2                                                                              |
| Solyc00g008580.1 | 180            | UDP-glucosyl transferase 73B5                                                               |
| Solyc00g009760.2 | 143            | Senescence-associated protein                                                               |
| Solyc00g009765.1 | 156            | Acetolactate synthase                                                                       |
| Solyc00g010525.1 | 156            | Tetratricopeptide repeat (TPR)-like superfamily protein                                     |
| Solyc00g010530.1 | 173            | protein FLOWERING locus D-like protein                                                      |
| Solyc00g011150.1 | 161            | photosystem II stability/assembly factor, chloroplast (HCF136)                              |
| Solyc00g011160.2 | 162            | Glucan endo-1,3-beta-glucosidase, basic vacuolar isoform                                    |
| Solyc00g011673.1 | 152            | ABC transporter G family member 5                                                           |
| Solyc00g011890.3 | 171            | L-arabinokinase                                                                             |
| Solyc00g012430.1 | 151            | alpha/beta-Hydrolases superfamily protein                                                   |
| Solyc00g013137.1 | 534            | NADH dehydrogenase subunit 2                                                                |
| Solyc00g013150.1 | 225            | U-box domain-containing protein kinase family protein                                       |
| Solyc00g013155.1 | 311            | Cytochrome c oxidase subunit 2                                                              |
| Solyc00g013160.2 | 1290           | NADH dehydrogenase subunit 4                                                                |
| Solyc00g013180.1 | 3901           | NADH-ubiquinone oxidoreductase chain 4                                                      |
| Solyc00g014790.2 | 613            | P-loop nucleoside triphosphate hydrolase superfamily protein                                |
| Solyc00g014800.1 | 3149           | Zinc finger family protein                                                                  |
| Solyc00g014820.2 | 602            | Pentatricopeptide repeat (PPR) superfamily protein                                          |
| Solyc00g014830.3 | 2241           | NADH dehydrogenase subunit 7                                                                |
| Solyc00g014850.1 | 7306           | Transcription factor jumonji (jmj) family protein / zinc finger (C5HC2 type) family protein |
| Solyc00g017860.1 | 144            | FAD/NAD(P)-binding oxidoreductase family protein                                            |
| Solyc00g102000.2 | 169            | Unknown protein                                                                             |
| Solyc00g019630.2 | 1802           | F-box/RNI-like superfamily protein                                                          |
| Solyc00g019730.2 | 1112           | Cytochrome c oxidase subunit 3                                                              |
| Solyc00g019740.1 | 3519           | ATPase subunit 8                                                                            |
| Solyc00g019950.1 | 1415           | NADH dehydrogenase subunit 9                                                                |
| Solyc00g019970.2 | 1704           | protein kinase family protein                                                               |
| Solyc00g019980.2 | 373            | FAM91 carboxy-terminus protein                                                              |
| Solyc00g020000.1 | 7500           | Mitogen-activated protein kinase                                                            |
| Solyc00g021630.1 | 6314           | NADH-ubiquinone oxidoreductase chain 6                                                      |
| Solyc00g021650.1 | 3091           | Tetratricopeptide repeat (TPR)-like superfamily protein                                     |
| Solyc00g022070.1 | 1034           | beta glucosidase 8                                                                          |
| Solyc00g022090.2 | 5833           | Formyltetrahydrofolate deformylase 1, mitochondrial                                         |

|                  |      |                                                                          |
|------------------|------|--------------------------------------------------------------------------|
| Solyc00g022103.1 | 1242 | Transducin family protein / WD-40 repeat family protein                  |
| Solyc00g023590.2 | 8391 | Pectin lyase-like superfamily protein                                    |
| Solyc00g023600.2 | 460  | SERINE CARBOXYPEPTIDASE-LIKE 49                                          |
| Solyc00g023700.2 | 3641 | Transcription elongation factor SPT5                                     |
| Solyc00g023710.1 | 216  | Maturase K                                                               |
| Solyc00g025290.1 | 256  | Alpha-1,4 glucan phosphorylase L-2 isozyme                               |
| Solyc00g025300.1 | 247  | transmembrane protein                                                    |
| Solyc00g025400.2 | 420  | basic helix-loop-helix (bHLH) DNA-binding superfamily protein            |
| Solyc00g025500.2 | 278  | Pyruvate dehydrogenase, putative                                         |
| Solyc00g027970.1 | 211  | alpha/beta-Hydrolases superfamily protein                                |
| Solyc00g036520.1 | 164  | RNA-binding (RRM/RBD/RNP motifs) family protein                          |
| Solyc00g036530.1 | 2192 | P-loop containing nucleoside triphosphate hydrolases superfamily protein |
| Solyc00g044550.1 | 617  | Ankyrin repeat family protein / BTB/POZ domain-containing protein        |
| Solyc00g044555.1 | 724  | Unknown protein                                                          |
| Solyc00g047190.1 | 718  | Light-independent protochlorophyllide reductase subunit B                |
| Solyc00g049210.1 | 378  | Cytochrome c biogenesis FN                                               |
| Solyc00g052540.1 | 3557 | RING/FYVE/PHD zinc finger superfamily protein                            |
| Solyc00g065510.2 | 194  | S-acyltransferase                                                        |
| Solyc00g068980.2 | 186  | Superoxide dismutase [Cu-Zn] 1                                           |
| Solyc00g069880.2 | 3966 | SET-domain containing protein lysine methyltransferase family protein    |
| Solyc00g072800.3 | 316  | B-block binding subunit of TFIIC                                         |
| Solyc06g050455.1 | 146  | FAR1-related sequence 4                                                  |
| Solyc06g024210.2 | 152  | Senescence-associated protein                                            |
| Solyc00g090130.2 | 158  | Protein translocase subunit SecA                                         |
| Solyc00g094520.1 | 506  | NADH-ubiquinone oxidoreductase chain 6                                   |
| Solyc00g094540.1 | 3072 | Bestrophin-like protein                                                  |
| Solyc00g101700.1 | 177  | Protein kinase                                                           |
| Solyc00g108550.1 | 243  | Homeodomain-like superfamily protein, putative isoform 1                 |
| Solyc00g112190.2 | 2153 | Longifolia protein                                                       |
| Solyc00g117655.1 | 195  | NADH-ubiquinone oxidoreductase chain 1                                   |
| Solyc00g117653.1 | 999  | Glucose-6-phosphate isomerase, cytosolic 1                               |
| Solyc00g136565.1 | 138  | 2-oxoglutarate-dependent dioxygenase-related family protein              |
| Solyc00g142170.3 | 3070 | Mitovirus RNA-dependent RNA polymerase                                   |
| Solyc00g153980.1 | 192  | jacalin-related lectin 22                                                |
| Solyc00g164580.1 | 2845 | phospholipase-like protein (PEARLI 4) family protein                     |
| Solyc00g165195.1 | 663  | UDP-glucose pyrophosphorylase 2                                          |
| Solyc00g179240.2 | 171  | MADS-box transcription factor                                            |
| Solyc00g181250.2 | 836  | P-loop containing nucleoside triphosphate hydrolases superfamily protein |
| Solyc00g183050.2 | 2712 | Vacuolar sorting-associated protein 27                                   |
| Solyc00g203660.2 | 137  | Ribulose biphosphate carboxylase large chain                             |

|                  |      |                                                                                |
|------------------|------|--------------------------------------------------------------------------------|
| Solyc00g210860.1 | 541  | disease resistance protein (TIR class)                                         |
| Solyc00g218560.1 | 388  | T-box transcription factor, putative (DUF863)                                  |
| Solyc00g230070.1 | 2413 | Photosystem II CP43 reaction center protein                                    |
| Solyc00g240580.2 | 242  | P-loop containing nucleoside triphosphate hydrolases superfamily protein       |
| Solyc00g273110.2 | 146  | DNA ligase 4                                                                   |
| Solyc00g281110.1 | 170  | inositol polyphosphate kinase 2 alpha                                          |
| Solyc00g294230.2 | 195  | Disease resistance protein (TIR-NBS-LRR class)                                 |
| Solyc00g308930.1 | 148  | Lysine-specific histone demethylase 1-like protein                             |
| Solyc00g313030.1 | 370  | ARM repeat superfamily protein                                                 |
| Solyc00g320430.1 | 1048 | Vascular endothelial growth factor receptor 2                                  |
| Solyc01g006730.3 | 164  | Calcium-dependent protein kinase                                               |
| Solyc01g010797.1 | 171  | F-box family protein                                                           |
| Solyc01g011310.1 | 203  | Eukaryotic aspartyl protease family protein                                    |
| Solyc01g011393.1 | 342  | U-box domain-containing protein 15                                             |
| Solyc01g013910.1 | 193  | Endoribonuclease Dicer 2b                                                      |
| Solyc01g014010.1 | 205  | Disease resistance protein (TIR-NBS-LRR class)                                 |
| Solyc01g014850.3 | 216  | Zinc finger transcription factor 7                                             |
| Solyc01g014855.1 | 146  | Retrotransposon protein, putative, Ty3-gypsy subclass                          |
| Solyc01g016450.1 | 198  | cysteine/histidine-rich C1 domain protein                                      |
| Solyc01g017090.3 | 247  | NADH dehydrogenase subunit                                                     |
| Solyc01g017200.2 | 193  | Acetyl-coenzyme A carboxylase carboxyl transferase subunit beta, chloroplastic |
| Solyc01g017220.1 | 156  | ATP synthase epsilon chain, chloroplastic                                      |
| Solyc01g017333.1 | 268  | NAD(P)H-quinone oxidoreductase chain 4, chloroplastic                          |
| Solyc01g017370.1 | 138  | DNA-directed RNA polymerase subunit                                            |
| Solyc01g017460.2 | 163  | DNA-directed RNA polymerase subunit                                            |
| Solyc01g017440.1 | 143  | DNA-directed RNA polymerase subunit alpha                                      |
| Solyc01g017530.1 | 137  | 30S ribosomal protein S2, chloroplastic                                        |
| Solyc01g017740.1 | 146  | Cytochrome b6                                                                  |
| Solyc01g019100.1 | 161  | NAD(P)H-quinone oxidoreductase subunit 1, chloroplastic                        |
| Solyc01g020430.1 | 140  | Sulfurtransferase                                                              |
| Solyc01g020470.2 | 199  | NADH dehydrogenase subunit 9                                                   |
| Solyc01g022780.1 | 182  | Nascent polypeptide-associated complex subunit beta                            |
| Solyc01g033990.1 | 178  | inositol-1,4,5-trisphosphate 5-phosphatase                                     |
| Solyc01g034023.1 | 136  | Polyketide cyclase/dehydrase and lipid transport superfamily protein           |
| Solyc01g034170.1 | 216  | Urease                                                                         |
| Solyc01g028987.1 | 443  | Dead box ATP-dependent RNA helicase, putative                                  |
| Solyc01g028870.3 | 143  | N utilization substance B                                                      |
| Solyc01g028805.1 | 190  | Cytochrome P450                                                                |
| Solyc01g044270.3 | 141  | DnaJ domain-containing protein                                                 |
| Solyc01g044305.1 | 371  | far-red elongated hypocotyl 1                                                  |
| Solyc01g044373.1 | 161  | HAT family dimerisation domain containing protein                              |
| Solyc01g050020.2 | 139  | Photosystem II CP47 reaction center protein                                    |

|                  |     |                                                                            |
|------------------|-----|----------------------------------------------------------------------------|
| Solyc01g055160.1 | 359 | S-locus F-box protein type-1                                               |
| Solyc01g056200.1 | 392 | Lactoylglutathione lyase / glyoxalase I family protein                     |
| Solyc01g056330.2 | 151 | DNA-directed RNA polymerase subunit beta                                   |
| Solyc01g056660.2 | 220 | S-locus F-box protein type-9                                               |
| Solyc01g056670.1 | 493 | NADH dehydrogenase subunit 4L                                              |
| Solyc01g056720.3 | 269 | small basic intrinsic protein 2.1                                          |
| Solyc01g056870.2 | 356 | Protein Ycf2                                                               |
| Solyc01g057137.1 | 418 | Retrovirus-related Pol polyprotein from transposon TNT 1-94                |
| Solyc01g057280.2 | 214 | 26S proteasome non-ATPase regulatory subunit-like protein                  |
| Solyc01g057530.1 | 199 | Pentatricopeptide repeat (PPR) superfamily protein                         |
| Solyc01g057570.3 | 207 | RNA-binding (RRM/RBD/RNP motifs) family protein                            |
| Solyc01g057585.1 | 154 | Retrovirus-related Pol polyprotein from transposon TNT 1-94                |
| Solyc01g057830.3 | 140 | 30S ribosomal protein S1                                                   |
| Solyc01g057960.2 | 167 | Homeobox leucine-zipper protein                                            |
| Solyc01g058003.1 | 148 | Transposon-like element Lyt2-2 DNA                                         |
| Solyc01g058220.2 | 275 | F-box family protein                                                       |
| Solyc01g058240.1 | 137 | Ypt/Rab-GAP domain of gyp1p superfamily protein                            |
| Solyc01g058327.1 | 331 | Gibberellin 3 beta-hydroxylase family protein                              |
| Solyc01g058410.1 | 326 | Cytochrome c oxidase subunit 2                                             |
| Solyc01g058420.1 | 216 | Ribosomal protein S3                                                       |
| Solyc01g058450.3 | 153 | Flowering time control protein FCA, putative                               |
| Solyc01g058500.3 | 161 | TBP-associated factor 2                                                    |
| Solyc01g058675.1 | 149 | Core-2/I-branching beta-1,6-N-acetylglucosaminyltransferase family protein |
| Solyc01g058703.1 | 138 | Retrovirus-related Pol polyprotein from transposon TNT 1-94                |
| Solyc01g059845.1 | 150 | Retrovirus-related Pol polyprotein from transposon TNT 1-94                |
| Solyc01g059900.3 | 158 | Dirigent protein                                                           |
| Solyc01g060085.1 | 192 | Ribulose biphosphate carboxylase large chain                               |
| Solyc01g060223.1 | 545 | Retrovirus-related Pol polyprotein from transposon 17.6                    |
| Solyc01g060425.1 | 240 | Retrotransposon protein, putative, Ty3-gypsy subclass                      |
| Solyc01g065915.1 | 233 | Protein CHLOROPLAST ENHANCING STRESS TOLERANCE, chloroplastic              |
| Solyc01g066205.1 | 150 | Retrovirus-related Pol polyprotein from transposon TNT 1-94                |
| Solyc01g066560.3 | 136 | Protein DETOXIFICATION                                                     |
| Solyc01g067460.2 | 207 | Glutaredoxin family protein                                                |
| Solyc09g064400.2 | 153 | Photosystem I reaction center subunit IX                                   |
| Solyc01g087490.3 | 165 | Peptidyl-prolyl cis-trans isomerase FKBP42                                 |
| Solyc01g087970.3 | 265 | Carboxypeptidase                                                           |
| Solyc01g094610.3 | 173 | Rop guanine nucleotide exchange factor, putative                           |
| Solyc01g096740.3 | 195 | Protein zinc induced facilitator-like 1                                    |
| Solyc01g100045.1 | 308 | Methyl-CpG-binding domain-containing family protein                        |
| Solyc01g103410.3 | 173 | KH domain-containing protein                                               |
| Solyc01g105520.3 | 158 | DNA helicase                                                               |
| Solyc01g106943.1 | 178 | Myosin heavy chain-like protein                                            |

|                  |     |                                                                     |
|------------------|-----|---------------------------------------------------------------------|
| Solyc01g109970.3 | 163 | SNF2 domain-containing protein / helicase domain-containing protein |
| Solyc02g043945.1 | 167 | Retrovirus-related Pol polyprotein from transposon TNT 1-94         |
| Solyc02g049070.3 | 156 | 4-coumarate:CoA ligase                                              |
| Solyc02g005350.3 | 258 | succinyl-CoA ligase alpha 2 subunit                                 |
| Solyc02g005365.1 | 163 | Transposon Ty3-I Gag-Pol polyprotein                                |
| Solyc02g005430.2 | 168 | Conglutin beta 7                                                    |
| Solyc02g005510.3 | 155 | Transcriptional coactivator/pterin dehydratase                      |
| Solyc02g011755.1 | 159 | Photosystem I iron-sulfur center                                    |
| Solyc02g011800.1 | 154 | NAD(P)H-quinone oxidoreductase subunit 1, chloroplastic             |
| Solyc02g011990.1 | 173 | Photosystem II protein D1                                           |
| Solyc02g012000.1 | 183 | ATP synthase subunit alpha, chloroplastic                           |
| Solyc02g014700.1 | 466 | histidine kinase 2                                                  |
| Solyc02g014860.3 | 145 | DnaJ domain-containing protein                                      |
| Solyc02g021390.1 | 143 | ATPase subunit 4                                                    |
| Solyc02g021560.3 | 194 | RNA-binding                                                         |
| Solyc02g021770.1 | 186 | Cytochrome c oxidase subunit 1                                      |
| Solyc02g023930.1 | 165 | Leucine-rich repeat protein kinase family protein                   |
| Solyc02g024000.3 | 224 | WPP domain-associated protein                                       |
| Solyc02g030580.1 | 173 | RNA polymerase II transcription mediator                            |
| Solyc02g031750.3 | 142 | Phloem protein 2-like protein                                       |
| Solyc02g032173.1 | 160 | Ninja-family protein                                                |
| Solyc02g032307.1 | 149 | Retrotransposon protein, putative, Ty3-gypsy subclass               |
| Solyc02g063080.1 | 171 | NAD(P)H-quinone oxidoreductase subunit K, chloroplastic             |
| Solyc02g067590.1 | 209 | DNA-directed RNA polymerase subunit beta                            |
| Solyc02g077860.1 | 149 | Ribulose biphosphate carboxylase large chain                        |
| Solyc02g080280.2 | 201 | NAD(P)H-quinone oxidoreductase subunit 1, chloroplastic             |
| Solyc02g080330.3 | 167 | Cytochrome P450 family protein                                      |
| Solyc02g080635.1 | 291 | Photosystem II CP43 reaction center protein                         |
| Solyc02g085510.1 | 161 | ovate family protein 1                                              |
| Solyc02g092580.3 | 137 | Peroxidase                                                          |
| Solyc03g025760.3 | 145 | Protein O-glucosyltransferase 1                                     |
| Solyc03g026130.3 | 161 | Cytochrome P450                                                     |
| Solyc03g043610.2 | 146 | ATP synthase subunit a                                              |
| Solyc03g044810.2 | 157 | Methyl jasmonate esterase                                           |
| Solyc03g071507.1 | 163 | Kinase interacting (KIP1-like) family protein                       |
| Solyc03g071520.1 | 191 | Hexosyltransferase                                                  |
| Solyc03g071710.1 | 153 | Cyclin-dependent protein kinase inhibitor Siamese                   |
| Solyc03g071720.3 | 150 | Phytol kinase                                                       |
| Solyc03g071790.1 | 322 | Defective in meristem silencing 3                                   |
| Solyc03g051590.2 | 146 | Protein Ycf2                                                        |
| Solyc03g051623.1 | 147 | Transposon Ty3-I Gag-Pol polyprotein                                |
| Solyc03g053100.3 | 136 | Kinesin-like protein                                                |
| Solyc03g058210.2 | 344 | 50S ribosomal protein L14, chloroplastic                            |
| Solyc03g058300.1 | 533 | F-box and associated interaction domains-containing protein         |

|                  |      |                                                                          |
|------------------|------|--------------------------------------------------------------------------|
| Solyc03g058920.3 | 168  | Mitochondrial outer membrane porin                                       |
| Solyc03g061540.1 | 718  | NADH dehydrogenase subunit 2                                             |
| Solyc03g061550.1 | 2554 | poly ADP-ribose polymerase 3                                             |
| Solyc03g061620.1 | 285  | Zinc finger family protein                                               |
| Solyc03g061640.1 | 175  | Chromatin remodeling protein, putative                                   |
| Solyc03g061655.1 | 305  | Ribosomal protein S12                                                    |
| Solyc03g063010.1 | 231  | cysteine-rich RECEPTOR-like kinase                                       |
| Solyc03g063070.1 | 209  | vacuolar protein sorting-associated protein, putative (DUF1162)          |
| Solyc03g063510.1 | 676  | NADH dehydrogenase subunit 2                                             |
| Solyc03g063515.1 | 758  | HAT family dimerisation domain containing protein, expressed             |
| Solyc03g063550.1 | 326  | cotton fiber protein                                                     |
| Solyc03g063750.3 | 182  | exostosin family protein                                                 |
| Solyc03g064040.1 | 199  | ubiquitin-specific protease 16                                           |
| Solyc03g065205.1 | 275  | DUF1336 family protein, putative (DUF1336)                               |
| Solyc03g065230.1 | 160  | Transposon protein, putative, CACTA, En/Spm sub-class                    |
| Solyc03g065250.3 | 162  | Fatty acid hydroxylase superfamily protein                               |
| Solyc03g013610.1 | 164  | 50S ribosomal protein L32, chloroplastic                                 |
| Solyc03g013615.1 | 164  | NAD(P)H-quinone oxidoreductase subunit I, chloroplastic                  |
| Solyc03g013605.1 | 385  | 30S ribosomal protein S18, chloroplastic                                 |
| Solyc03g013470.1 | 321  | DNA polymerase                                                           |
| Solyc03g013460.1 | 247  | Cytochrome c oxidase subunit 3                                           |
| Solyc03g013390.1 | 296  | Cytochrome c oxidase subunit 3                                           |
| Solyc03g013377.1 | 136  | Retrovirus-related Pol polyprotein from transposon TNT 1-94              |
| Solyc03g078005.1 | 250  | Photosystem I P700 chlorophyll a apoprotein A1                           |
| Solyc03g078070.2 | 197  | Glycine dehydrogenase (decarboxylating) 1, mitochondrial                 |
| Solyc03g078330.1 | 175  | 3-ketoacyl-CoA synthase                                                  |
| Solyc03g082685.1 | 162  | Neuroblastoma-amplified protein                                          |
| Solyc03g083610.3 | 151  | UMP-CMP kinase                                                           |
| Solyc03g083665.1 | 428  | transmembrane protein                                                    |
| Solyc03g095380.2 | 149  | Unknown protein                                                          |
| Solyc03g097090.3 | 162  | Lysine-specific demethylase                                              |
| Solyc03g097350.3 | 155  | Kinase family protein                                                    |
| Solyc03g097886.1 | 147  | 50S ribosomal protein L14, chloroplastic                                 |
| Solyc03g112520.3 | 201  | FKBP12-interacting of 37 kDa-like protein                                |
| Solyc03g115380.2 | 156  | UDP-glucose 6-dehydrogenase family protein                               |
| Solyc03g115720.3 | 142  | zinc finger (C3HC4-type RING finger) family protein                      |
| Solyc03g116370.3 | 324  | RP/EB family microtubule-associated protein                              |
| Solyc03g118525.1 | 147  | ATP-dependent helicase/deoxyribonuclease subunit B                       |
| Solyc03g119170.3 | 179  | Ribosomal protein S24/S35, mitochondrial                                 |
| Solyc03g122000.3 | 437  | Cytochrome b6-f complex subunit 4                                        |
| Solyc04g005330.3 | 172  | Alpha-1,4-glucan-protein synthase                                        |
| Solyc04g005830.3 | 176  | P-loop containing nucleoside triphosphate hydrolases superfamily protein |

|                  |     |                                                                             |
|------------------|-----|-----------------------------------------------------------------------------|
| Solyc04g011620.3 | 293 | Peptidyl-prolyl cis-trans isomerase FKBP20-1 (AHRD V3.3 ***<br>FK201_ARATH) |
| Solyc04g012200.1 | 142 | Protein kinase superfamily protein                                          |
| Solyc04g016170.2 | 195 | Photosystem I P700 chlorophyll a apoprotein A2                              |
| Solyc04g018035.1 | 283 | Ty3-gypsy retrotransposon protein                                           |
| Solyc04g018140.1 | 149 | F-box/RNI-like superfamily protein                                          |
| Solyc04g018143.1 | 148 | Retrotransposon protein, putative, Ty3-gypsy subclass                       |
| Solyc04g018175.1 | 166 | Plant L-ascorbate oxidase                                                   |
| Solyc04g039850.1 | 349 | ATP synthase subunit beta                                                   |
| Solyc04g026105.1 | 141 | Retrovirus-related Pol polyprotein from transposon TNT 1-94                 |
| Solyc04g025993.1 | 170 | Zinc finger, RanBP2-type                                                    |
| Solyc04g025400.3 | 146 | Lipid phosphate phosphatase                                                 |
| Solyc04g025375.1 | 245 | Retrovirus-related Pol polyprotein from transposon TNT 1-94                 |
| Solyc04g025288.1 | 192 | chromatin remodeling 38                                                     |
| Solyc04g025120.2 | 140 | ATPase                                                                      |
| Solyc04g045470.3 | 165 | O-fucosyltransferase family protein                                         |
| Solyc04g045475.1 | 284 | O-fucosyltransferase family protein                                         |
| Solyc04g045640.1 | 183 | Pyrophosphate--fructose 6-phosphate 1-phosphotransferase subunit<br>alpha 1 |
| Solyc04g047880.1 | 136 | RING/U-box superfamily protein                                              |
| Solyc04g049003.1 | 174 | Cytochrome c biogenesis protein CcsA                                        |
| Solyc04g049090.3 | 159 | SIM1o1                                                                      |
| Solyc04g049240.1 | 173 | Photosystem II protein D1                                                   |
| Solyc04g049250.1 | 184 | Transport membrane protein                                                  |
| Solyc04g049620.2 | 159 | 2-oxoglutarate (2OG) and Fe(II)-dependent oxygenase superfamily<br>protein  |
| Solyc04g049673.1 | 171 | 50S ribosomal protein L20, chloroplastic                                    |
| Solyc04g049780.2 | 148 | Retrovirus-related Pol polyprotein from transposon TNT 1-94                 |
| Solyc04g050430.1 | 408 | 60S ribosomal protein L12                                                   |
| Solyc04g050440.3 | 175 | ammonium transporter                                                        |
| Solyc04g050800.2 | 305 | G-type lectin S-receptor-like serine/threonine-protein kinase<br>At5g24080  |
| Solyc04g050803.1 | 144 | Retrovirus-related Pol polyprotein from transposon TNT 1-94                 |
| Solyc04g051270.2 | 216 | CASP-like protein                                                           |
| Solyc04g054513.1 | 155 | Retrovirus-related Pol polyprotein from transposon TNT 1-94                 |
| Solyc04g056320.2 | 218 | Protein SENSITIVE TO PROTON RHIZOTOXICITY 1                                 |
| Solyc04g072265.1 | 197 | Midasin                                                                     |
| Solyc04g080730.3 | 250 | mitogen-activated protein kinase 9                                          |
| Solyc04g082490.3 | 160 | Niemann-Pick C1                                                             |
| Solyc04g082990.3 | 191 | Tetratricopeptide repeat protein 37                                         |
| Solyc05g005130.2 | 202 | Disease resistance protein, putative                                        |
| Solyc05g007720.1 | 319 | Helicase/SANT-associated, DNA binding protein                               |
| Solyc05g008560.2 | 193 | Pentatricopeptide repeat-containing protein, putative                       |
| Solyc05g010400.3 | 174 | NSP-interacting kinase 1                                                    |

|                  |     |                                                                                |
|------------------|-----|--------------------------------------------------------------------------------|
| Solyc05g013420.1 | 242 | myb-like transcription factor family protein                                   |
| Solyc05g013430.1 | 147 | myb-like transcription factor family protein                                   |
| Solyc05g013510.3 | 177 | Phosphate transporter                                                          |
| Solyc05g013530.3 | 245 | Octicosapeptide/Phox/Bem1p domain-containing protein kinase                    |
| Solyc05g014570.1 | 199 | MYB family transcription factor                                                |
| Solyc05g014880.2 | 553 | Histone H2A                                                                    |
| Solyc05g015715.1 | 270 | HAT family dimerisation domain containing protein                              |
| Solyc05g015945.1 | 156 | hydroxysteroid dehydrogenase 2                                                 |
| Solyc05g015990.1 | 161 | serine carboxypeptidase-like 43                                                |
| Solyc05g016120.2 | 210 | Photosystem II protein D1                                                      |
| Solyc05g016220.1 | 138 | Ycf1                                                                           |
| Solyc05g016230.3 | 164 | Protein BREAST CANCER SUSCEPTIBILITY 1-like protein                            |
| Solyc05g016727.1 | 175 | HAT family dimerisation domain containing protein                              |
| Solyc05g018595.1 | 207 | Retrovirus-related Pol polyprotein from transposon TNT 1-94                    |
| Solyc05g018860.1 | 337 | DCD (Development and Cell Death) domain protein                                |
| Solyc05g018910.2 | 266 | Kinase, putative                                                               |
| Solyc05g019980.2 | 141 | trichome birefringence-like protein (DUF828)                                   |
| Solyc05g019985.1 | 154 | ZF-HD homeobox protein                                                         |
| Solyc05g020010.1 | 225 | Photosystem I P700 chlorophyll a apoprotein A2                                 |
| Solyc05g020047.1 | 194 | Transport membrane protein                                                     |
| Solyc05g021247.1 | 156 | LINE-1 reverse transcriptase like                                              |
| Solyc05g021410.2 | 159 | histone-lysine N-methyltransferase SUV5                                        |
| Solyc05g021480.1 | 162 | homeobox-leucine zipper protein ATHB-8                                         |
| Solyc05g023610.1 | 141 | cadherin EGF LAG seven-pass G-type receptor, putative (DUF3527)                |
| Solyc05g023720.1 | 248 | Cytochrome f                                                                   |
| Solyc05g023775.1 | 159 | NADH-quinone oxidoreductase protein                                            |
| Solyc05g023920.1 | 318 | NADH-ubiquinone oxidoreductase chain 1                                         |
| Solyc05g024100.1 | 194 | Lysine-specific histone demethylase 1-like protein                             |
| Solyc05g024245.1 | 175 | Enoyl CoA hydratase/isomerase                                                  |
| Solyc05g025500.3 | 192 | Glucan endo-1,3-beta-glucosidase, putative                                     |
| Solyc05g025580.1 | 342 | N-glycosylase/DNA lyase OGG1                                                   |
| Solyc05g025670.1 | 736 | Respiratory burst oxidase, putative                                            |
| Solyc05g025700.1 | 314 | Cytochrome c biogenesis FC                                                     |
| Solyc05g025820.3 | 218 | Kinase family protein                                                          |
| Solyc05g026200.1 | 146 | Acetyl-coenzyme A carboxylase carboxyl transferase subunit beta, chloroplastic |
| Solyc05g026510.3 | 370 | Sister-chromatide cohesion protein 3                                           |
| Solyc05g032750.3 | 150 | EEIG1/EHBP1 protein amino-terminal domain protein                              |
| Solyc05g032730.1 | 186 | Protein DETOXIFICATION                                                         |
| Solyc05g039960.1 | 175 | NHL domain-containing protein, putative                                        |
| Solyc05g041170.2 | 270 | Mediator of RNA polymerase II transcription subunit 20-like protein            |
| Solyc05g041200.3 | 200 | 4-hydroxyphenylpyruvate dioxygenase                                            |
| Solyc05g041230.1 | 168 | Photosystem II CP43 reaction center protein                                    |

|                  |     |                                                                           |
|------------------|-----|---------------------------------------------------------------------------|
| Solyc05g041400.1 | 619 | NADH:ubiquinone oxidoreductase, subunit 1/F420H2 oxidoreductase subunit H |
| Solyc05g042110.1 | 159 | Disease resistance protein                                                |
| Solyc05g044510.2 | 261 | RNA helicase DEAH-box17                                                   |
| Solyc05g044570.2 | 153 | Helicase protein with RING/U-box domain-containing protein                |
| Solyc05g045730.1 | 306 | transcriptional regulator EFH1-like protein                               |
| Solyc05g045740.1 | 941 | P-loop containing nucleoside triphosphate hydrolases superfamily protein  |
| Solyc05g045750.2 | 377 | Maturase K                                                                |
| Solyc05g045777.1 | 559 | Cytochrome c oxidase subunit 2                                            |
| Solyc05g046287.1 | 159 | At2g11520-like protein                                                    |
| Solyc05g047580.3 | 139 | Terpene cyclase/mutase family member                                      |
| Solyc05g050820.3 | 202 | DNAJ                                                                      |
| Solyc05g052640.3 | 311 | Mitochondrial substrate carrier family protein                            |
| Solyc05g054710.3 | 173 | Beta-hexosaminidase                                                       |
| Solyc05g055040.3 | 152 | Hexosyltransferase                                                        |
| Solyc06g005600.3 | 143 | Scarecrow-like transcription factor 11, putative isoform 1                |
| Solyc06g009710.3 | 230 | R2R3MYB transcription factor 111                                          |
| Solyc06g009940.1 | 184 | Photosystem I P700 chlorophyll a apoprotein A1                            |
| Solyc06g009980.1 | 148 | Nucleotide-diphospho-sugar transferases superfamily protein               |
| Solyc06g010165.1 | 372 | Nucleotide/sugar transporter family protein                               |
| Solyc06g010170.3 | 191 | lysine ketoglutarate reductase trans-splicing protein (DUF707)            |
| Solyc06g010260.3 | 242 | SNF1-related protein kinase regulatory subunit beta-2                     |
| Solyc06g010270.1 | 141 | Pentatricopeptide repeat-containing protein, putative                     |
| Solyc06g011490.3 | 181 | Unknown protein                                                           |
| Solyc06g024380.1 | 187 | DNA polymerase epsilon catalytic subunit                                  |
| Solyc06g024375.1 | 175 | Cytochrome c oxidase subunit 1                                            |
| Solyc06g024310.1 | 343 | Elongation defective 1 family protein                                     |
| Solyc06g024240.1 | 167 | ribosomal protein 1                                                       |
| Solyc06g024245.1 | 177 | Class II aaRS and biotin synthetases superfamily protein                  |
| Solyc06g016700.1 | 468 | 2-oxoglutarate (2OG) and Fe(II)-dependent oxygenase superfamily protein   |
| Solyc06g016765.1 | 171 | Reverse transcriptase                                                     |
| Solyc06g018050.3 | 146 | mitochondrial calcium uniporter complex protein-like                      |
| Solyc06g030630.1 | 174 | Delta-aminolevulinic acid dehydratase, chloroplastic                      |
| Solyc06g031740.2 | 249 | ABC transporter G family member 22                                        |
| Solyc06g032740.1 | 191 | Protein Ycf2                                                              |
| Solyc06g033782.1 | 178 | Retrovirus-related Pol polyprotein from transposon TNT 1-94               |
| Solyc06g035555.1 | 147 | MADS-box transcription factor                                             |
| Solyc06g036020.1 | 158 | kinesin-like protein 1                                                    |
| Solyc06g036130.3 | 178 | Protein DETOXIFICATION                                                    |
| Solyc06g036210.1 | 142 | NAD(P)H-quinone oxidoreductase subunit K, chloroplastic                   |
| Solyc06g036505.1 | 143 | Retrovirus-related Pol polyprotein from transposon TNT 1-94               |
| Solyc06g036580.3 | 175 | U4/U6 small nuclear ribonucleoprotein Prp3                                |

|                  |     |                                                                                |
|------------------|-----|--------------------------------------------------------------------------------|
| Solyc06g036770.1 | 645 | CASP-like protein                                                              |
| Solyc06g036803.1 | 284 | Skp1                                                                           |
| Solyc06g043038.1 | 177 | Ycf68                                                                          |
| Solyc06g042990.1 | 232 | ATPase subunit 4                                                               |
| Solyc06g048480.3 | 177 | Transducin/WD40 repeat protein                                                 |
| Solyc06g048680.2 | 322 | GDSL esterase/lipase                                                           |
| Solyc06g050490.1 | 178 | Disease resistance protein (CC-NBS-LRR class) family protein,<br>putative      |
| Solyc06g050530.3 | 191 | Laccase                                                                        |
| Solyc06g050925.1 | 180 | Retrovirus-related Pol polyprotein from transposon TNT 1-94                    |
| Solyc06g051330.1 | 142 | IQ-domain 30                                                                   |
| Solyc06g053430.3 | 171 | selenoprotein family protein                                                   |
| Solyc06g060380.3 | 139 | Sister chromatid cohesion PDS5-like protein                                    |
| Solyc06g062375.1 | 163 | Acid phosphatase 1                                                             |
| Solyc06g064450.3 | 185 | Cytoplasmic membrane protein                                                   |
| Solyc06g068840.3 | 164 | Calcium-dependent phospholipid-binding Copine family protein                   |
| Solyc06g072380.3 | 182 | 3,4-dihydroxy-2-butanone kinase                                                |
| Solyc06g072540.1 | 150 | ATP synthase subunit alpha, chloroplastic                                      |
| Solyc06g074040.1 | 311 | Late embryogenesis abundant (LEA) hydroxyproline-rich<br>glycoprotein family   |
| Solyc06g074590.2 | 241 | Protein Ycf2                                                                   |
| Solyc06g074600.1 | 165 | DNA-directed RNA polymerase subunit beta                                       |
| Solyc06g084624.1 | 139 | DWNN domain, a CCHC-type zinc finger                                           |
| Solyc07g004993.1 | 184 | Phosphatidylinositol N-acetylglucosaminyltransferase subunit P-like<br>protein |
| Solyc07g007710.3 | 148 | Defensin protein                                                               |
| Solyc07g008170.2 | 194 | Methyl-CpG-binding domain protein                                              |
| Solyc07g008760.3 | 210 | Tetrapeptide repeat-containing protein                                         |
| Solyc07g008990.1 | 259 | Photosystem II D2 protein                                                      |
| Solyc07g009350.3 | 144 | U3 small nucleolar RNA-associated protein                                      |
| Solyc07g017343.1 | 142 | MADS-box transcription factor                                                  |
| Solyc07g017730.3 | 202 | Glucan endo-1,3-beta-glucosidase, putative                                     |
| Solyc07g018387.1 | 158 | Photosystem II reaction center protein I                                       |
| Solyc07g019480.1 | 150 | B3 domain-containing protein family                                            |
| Solyc07g019500.2 | 152 | B3 DNA-binding domain protein                                                  |
| Solyc07g019505.1 | 274 | Cytochrome c oxidase subunit 1                                                 |
| Solyc07g019510.3 | 338 | Cytochrome c oxidase subunit 1                                                 |
| Solyc07g019520.1 | 147 | Isocitrate lyase                                                               |
| Solyc07g020807.1 | 271 | Retrovirus-related Pol polyprotein from transposon TNT 1-94                    |
| Solyc07g021110.1 | 196 | Protein Ycf2                                                                   |
| Solyc07g021120.2 | 152 | conserved telomere maintenance component 1                                     |
| Solyc07g021330.2 | 322 | Retrovirus-related Pol polyprotein from transposon TNT 1-94                    |
| Solyc07g021660.2 | 445 | Ubiquitin-conjugating enzyme family protein                                    |
| Solyc07g024040.2 | 171 | Photosystem I reaction center subunit VIII                                     |

|                  |      |                                                                      |
|------------------|------|----------------------------------------------------------------------|
| Solyc07g025130.1 | 448  | Ribosomal protein L2                                                 |
| Solyc07g025450.2 | 137  | histidine kinase 1                                                   |
| Solyc07g026600.1 | 293  | plant-specific transcription factor YABBY family protein             |
| Solyc07g026630.1 | 138  | Cysteine/Histidine-rich C1 domain family protein                     |
| Solyc07g026650.3 | 196  | 1-aminocyclopropane-1-carboxylate oxidase 5                          |
| Solyc07g026725.1 | 176  | Retrovirus-related Pol polyprotein from transposon TNT 1-94          |
| Solyc07g032020.2 | 289  | DNA-directed RNA polymerase subunit                                  |
| Solyc07g032075.1 | 220  | 50S ribosomal protein L20, chloroplastic                             |
| Solyc07g032290.2 | 155  | Tryptophan/tyrosine permease                                         |
| Solyc07g032450.1 | 167  | Cytochrome b6                                                        |
| Solyc07g037960.1 | 149  | Ectonucleotide pyrophosphatase/phosphodiesterase, putative           |
| Solyc07g039195.1 | 221  | Dystrophin-1                                                         |
| Solyc07g039585.1 | 150  | HAT family dimerisation domain containing protein, expressed         |
| Solyc07g040970.1 | 317  | ribosomal protein L5                                                 |
| Solyc07g041300.2 | 214  | Spermidine synthase                                                  |
| Solyc07g041513.1 | 174  | UDP-Glycosyltransferase superfamily protein                          |
| Solyc07g041630.1 | 146  | NADH dehydrogenase subunit 2                                         |
| Solyc07g041970.3 | 229  | Subtilisin-like protease                                             |
| Solyc07g042220.2 | 161  | Beta-galactosidase                                                   |
| Solyc07g045185.1 | 253  | CONSTANS-like zinc finger protein                                    |
| Solyc07g045230.3 | 272  | U-box domain-containing protein                                      |
| Solyc07g049220.3 | 153  | Serine/threonine protein phosphatase 2A regulatory subunit B         |
| Solyc07g052065.1 | 217  | Retrovirus-related Pol polyprotein from transposon TNT 1-94          |
| Solyc07g052880.3 | 359  | Formin-like protein                                                  |
| Solyc07g061900.3 | 151  | 50S ribosomal protein L4, putative                                   |
| Solyc07g062400.3 | 139  | multiprotein bridging factor 1c                                      |
| Solyc07g063260.3 | 182  | MLO-like protein                                                     |
| Solyc07g063350.3 | 170  | COP1-interacting protein, putative                                   |
| Solyc08g006025.1 | 160  | NAC domain-containing protein                                        |
| Solyc08g006254.1 | 181  | serine/threonine-protein kinase AFC1                                 |
| Solyc08g006256.1 | 160  | serine/threonine-protein kinase AFC1                                 |
| Solyc08g015810.2 | 141  | GDA1/CD39 nucleoside phosphatase family protein                      |
| Solyc08g015965.1 | 189  | Retrovirus-related Pol polyprotein from transposon TNT 1-94          |
| Solyc08g016080.3 | 322  | high chlorophyll fluorescence phenotype 173                          |
| Solyc08g036550.1 | 239  | disease resistance protein (TIR class)                               |
| Solyc08g036520.2 | 2162 | Diphosphomevalonate decarboxylase                                    |
| Solyc08g036500.1 | 203  | Orf101b                                                              |
| Solyc08g036440.2 | 159  | Feruloyl transferase                                                 |
| Solyc08g036410.1 | 415  | arabinogalactan protein 12                                           |
| Solyc08g048160.1 | 504  | Gamma-tubulin complex component                                      |
| Solyc08g048080.1 | 453  | Polyketide cyclase/dehydrase and lipid transport superfamily protein |
| Solyc08g045880.1 | 149  | Protein YIPF                                                         |
| Solyc08g045870.2 | 177  | Ribosomal protein S3                                                 |
| Solyc08g045860.1 | 155  | basic helix-loop-helix (bHLH) DNA-binding superfamily protein        |

|                  |      |                                                                            |
|------------------|------|----------------------------------------------------------------------------|
| Solyc08g045850.3 | 158  | pentatricopeptide repeat-containing protein                                |
| Solyc08g045750.1 | 161  | mediator of RNA polymerase II transcription subunit                        |
| Solyc08g044610.2 | 164  | Protein phosphatase 2C family protein                                      |
| Solyc08g044440.1 | 144  | Strubbelig receptor family protein                                         |
| Solyc08g044240.1 | 174  | Chloroplastic group IIA intron splicing facilitator CRS1,<br>chloroplastic |
| Solyc08g042060.2 | 167  | SET domain-containing protein                                              |
| Solyc08g023637.1 | 168  | Unknown protein                                                            |
| Solyc08g023493.1 | 136  | Stem-specific TSJT1                                                        |
| Solyc08g023440.3 | 155  | Early-responsive to dehydration stress family protein                      |
| Solyc08g023320.1 | 189  | hAT transposon superfamily protein                                         |
| Solyc08g022070.3 | 283  | Prolyl oligopeptidase family protein                                       |
| Solyc08g029260.1 | 1096 | NADH dehydrogenase subunit 2                                               |
| Solyc08g029010.1 | 168  | Disease resistance protein (CC-NBS-LRR class) family                       |
| Solyc08g028950.2 | 187  | DNA-directed RNA polymerase subunit beta                                   |
| Solyc08g028880.2 | 136  | 30S ribosomal protein S2, chloroplastic                                    |
| Solyc08g028857.1 | 179  | Unknown protein                                                            |
| Solyc08g059690.1 | 229  | AT hook motif DNA-binding family protein                                   |
| Solyc08g059800.3 | 201  | TPX2 (targeting protein for Xklp2) protein family                          |
| Solyc08g061160.2 | 225  | BnaC09g16480D protein                                                      |
| Solyc08g061240.2 | 163  | alpha/beta-Hydrolases superfamily protein                                  |
| Solyc08g061493.1 | 149  | Transposon Ty3-G Gag-Pol polyprotein                                       |
| Solyc08g062275.1 | 149  | 3-oxoacyl-[acyl-carrier-protein] synthase                                  |
| Solyc08g062545.1 | 242  | Retrovirus-related Pol polyprotein from transposon TNT 1-94                |
| Solyc08g062675.1 | 165  | Retrovirus-related Pol polyprotein from transposon TNT 1-94                |
| Solyc08g065163.1 | 167  | Retrovirus-related Pol polyprotein from transposon TNT 1-94                |
| Solyc08g067170.2 | 166  | Retrovirus-related Pol polyprotein from transposon TNT 1-94                |
| Solyc08g074980.3 | 151  | Kinase family protein                                                      |
| Solyc08g076355.1 | 145  | Retrovirus-related Pol polyprotein from transposon TNT 1-94                |
| Solyc08g076550.2 | 272  | Phosphomannomutase                                                         |
| Solyc08g076560.1 | 201  | Phosphomannomutase                                                         |
| Solyc08g077470.3 | 167  | Reticulon family protein                                                   |
| Solyc08g078800.2 | 210  | GRAS family transcription factor                                           |
| Solyc08g081750.3 | 177  | CAAX amino terminal protease family protein                                |
| Solyc08g082120.2 | 145  | Methanol inducible protein                                                 |
| Solyc08g082560.3 | 153  | F-box SKIP8-like protein                                                   |
| Solyc08g082620.3 | 151  | 3-oxoacyl-[acyl-carrier-protein] synthase                                  |
| Solyc09g007070.2 | 156  | RING/U-box superfamily protein                                             |
| Solyc09g008080.3 | 160  | Ribosomal protein S5/Elongation factor G/III/V family protein              |
| Solyc09g008750.1 | 153  | VQ motif-containing protein, putative                                      |
| Solyc09g009880.3 | 286  | F-box family protein                                                       |
| Solyc09g010630.3 | 150  | HSC2-like                                                                  |
| Solyc09g014440.3 | 197  | RNA polymerase II C-terminal domain phosphatase-like 2                     |
| Solyc09g014980.3 | 195  | Protein SCAR2, putative                                                    |

|                  |      |                                                                                       |
|------------------|------|---------------------------------------------------------------------------------------|
| Solyc09g015150.1 | 467  | Shattering 4                                                                          |
| Solyc09g015320.2 | 264  | Photosystem I assembly protein Ycf3                                                   |
| Solyc09g015440.1 | 138  | GDT1-like protein                                                                     |
| Solyc09g015600.2 | 395  | Ubiquitin carboxyl-terminal hydrolase-like protein                                    |
| Solyc09g015650.3 | 137  | Non-green plastid inner envelope membrane protein                                     |
| Solyc09g015880.3 | 170  | Cytochrome c oxidase subunit 2                                                        |
| Solyc09g015890.3 | 1280 | DNA-directed RNA polymerase subunit beta                                              |
| Solyc09g015900.1 | 1133 | Metallo-hydrolase/oxidoreductase superfamily protein                                  |
| Solyc09g016930.1 | 136  | Photosystem II CP43 reaction center protein                                           |
| Solyc09g016957.1 | 277  | Ubiquitin carboxyl-terminal hydrolase                                                 |
| Solyc09g018235.1 | 146  | Retrovirus-related Pol polyprotein from transposon TNT 1-94                           |
| Solyc09g018630.3 | 154  | Bis(5'-adenosyl)-triphosphatase                                                       |
| Solyc09g020157.1 | 158  | MuDR family transposase containing protein                                            |
| Solyc09g037180.1 | 154  | Protein KINESIN LIGHT CHAIN-RELATED 3                                                 |
| Solyc09g042600.1 | 327  | Unknown protein                                                                       |
| Solyc09g042800.1 | 166  | DNA-directed RNA polymerase subunit beta                                              |
| Solyc09g030470.1 | 168  | Disease resistance protein (TIR-NBS-LRR class) family                                 |
| Solyc09g030453.1 | 159  | Transposon Ty3-G Gag-Pol polyprotein                                                  |
| Solyc09g050020.2 | 851  | cytochrome b                                                                          |
| Solyc09g050030.1 | 490  | 30S ribosomal protein S14, putative                                                   |
| Solyc09g050040.1 | 671  | Ribosomal protein L5                                                                  |
| Solyc09g050050.1 | 364  | DNA-directed RNA polymerase subunit beta                                              |
| Solyc09g055210.1 | 144  | DNA topoisomerase, type IA, core                                                      |
| Solyc09g055355.1 | 238  | inhibitor/lipid-transfer protein/seed storage 2S albumin superfamily protein (DUF784) |
| Solyc09g055810.1 | 357  | Protein transport protein sec23, putative                                             |
| Solyc09g055840.1 | 192  | NAD(P)H-quinone oxidoreductase subunit 2, chloroplastic                               |
| Solyc09g055950.1 | 249  | Photosystem II D2 protein                                                             |
| Solyc09g056040.3 | 143  | E3 ubiquitin-protein ligase UPL5-like protein                                         |
| Solyc09g056170.3 | 315  | Fimbrin, putative                                                                     |
| Solyc09g056250.1 | 148  | Orotidine 5'-phosphate decarboxylase                                                  |
| Solyc09g057767.1 | 265  | ZF-HD homeobox protein                                                                |
| Solyc09g057810.1 | 219  | Maturase-related protein                                                              |
| Solyc09g057880.3 | 173  | Far-red impaired responsive (FAR1) family protein                                     |
| Solyc09g058977.1 | 176  | HAT family dimerisation domain containing protein                                     |
| Solyc09g059045.1 | 1017 | Retrovirus-related Pol polyprotein from transposon TNT 1-94                           |
| Solyc09g059510.3 | 445  | Ethylene-responsive transcription factor-like protein                                 |
| Solyc09g059650.3 | 217  | Vacuolar iron transporter family protein                                              |
| Solyc09g059800.1 | 147  | Acyl-CoA N-acyltransferases (NAT) superfamily protein                                 |
| Solyc09g059880.1 | 268  | Amino acid transporter, putative                                                      |
| Solyc09g061390.1 | 137  | Maturase K                                                                            |
| Solyc09g061460.2 | 235  | NAD(P)H-quinone oxidoreductase subunit 2, chloroplastic                               |
| Solyc09g061535.1 | 203  | Unknown protein                                                                       |
| Solyc09g061560.2 | 258  | Protein OBERON 1-like protein                                                         |

|                  |     |                                                                                |
|------------------|-----|--------------------------------------------------------------------------------|
| Solyc09g061580.1 | 302 | Protein OBERON 1-like protein                                                  |
| Solyc09g061910.2 | 252 | Calcium-dependent lipid-binding (CaLB domain) family protein                   |
| Solyc09g064430.3 | 163 | Tyrosine decarboxylase family protein                                          |
| Solyc09g064670.2 | 159 | Leucine-rich repeat receptor-like protein kinase family protein                |
| Solyc09g065710.1 | 140 | Pentatricopeptide repeat-containing protein, putative                          |
| Solyc09g065770.1 | 140 | Ubiquitin-conjugating enzyme/RWD-like protein, putative                        |
| Solyc09g065790.1 | 166 | ATP-dependent Clp protease proteolytic subunit                                 |
| Solyc09g066220.1 | 216 | zinc ion binding/nucleic acid binding/hydrolase                                |
| Solyc09g066420.3 | 143 | TBC1 domain family protein                                                     |
| Solyc09g076053.1 | 140 | Retrotransposon protein, putative, Ty3-gypsy subclass                          |
| Solyc09g091410.1 | 152 | Acetyl-coenzyme A carboxylase carboxyl transferase subunit beta, chloroplastic |
| Solyc10g005000.3 | 177 | SUN-like protein 27                                                            |
| Solyc10g006910.2 | 171 | 50S ribosomal protein L16, chloroplastic                                       |
| Solyc10g009070.3 | 278 | RNA helicase DEAD32                                                            |
| Solyc10g012230.1 | 146 | Protein Ycf2                                                                   |
| Solyc10g017890.1 | 157 | Photosystem I P700 chlorophyll a apoprotein A1                                 |
| Solyc10g017920.1 | 156 | DNA-directed RNA polymerase subunit beta                                       |
| Solyc10g017950.2 | 156 | Photosystem II reaction center protein Z                                       |
| Solyc10g018198.1 | 179 | Retrovirus-related Pol polyprotein from transposon TNT 1-94                    |
| Solyc10g018300.2 | 249 | Transketolase                                                                  |
| Solyc10g018520.1 | 146 | 3'-5' exonuclease domain-containing family protein                             |
| Solyc06g034317.1 | 169 | MADS-box transcription factor family protein                                   |
| Solyc10g018830.1 | 419 | UDP-Glycosyltransferase superfamily protein                                    |
| Solyc10g018840.2 | 208 | Photosystem II CP43 reaction center protein                                    |
| Solyc10g019020.1 | 163 | Anthranilate O-methyltransferase 1                                             |
| Solyc10g024415.1 | 196 | RNA 2'-phosphotransferase, Tpt1 / KptA family                                  |
| Solyc10g031550.1 | 386 | DNA-directed RNA polymerase subunit beta                                       |
| Solyc10g031560.1 | 273 | DNA-directed RNA polymerase subunit                                            |
| Solyc10g036620.2 | 156 | UDP-D-glucose/UDP-D-galactose 4-epimerase 3                                    |
| Solyc10g037990.1 | 160 | Maturase K                                                                     |
| Solyc10g039290.2 | 151 | Nitrate transporter protein 1.2-like protein                                   |
| Solyc10g061830.2 | 155 | Photosystem II CP43 reaction center protein                                    |
| Solyc10g061980.1 | 360 | Neutral/alkaline invertase                                                     |
| Solyc10g061990.2 | 498 | NADH-ubiquinone oxidoreductase chain 4                                         |
| Solyc10g062117.1 | 156 | Retrovirus-related Pol polyprotein from transposon TNT 1-94                    |
| Solyc10g044540.2 | 143 | ATP synthase subunit alpha, chloroplastic                                      |
| Solyc10g044547.1 | 602 | Formin-like protein                                                            |
| Solyc10g044900.2 | 184 | Ion channel DMI1                                                               |
| Solyc10g044993.1 | 165 | Retrovirus-related Pol polyprotein from transposon TNT 1-94                    |
| Solyc10g045190.2 | 211 | RNA-DIRECTED DNA METHYLATION 1                                                 |
| Solyc10g045290.2 | 218 | Kinase interacting (KIP1-like) family protein, putative                        |
| Solyc10g045350.2 | 139 | ecotropic viral integration site protein                                       |
| Solyc10g045690.1 | 143 | Gibberellin 20-oxidase                                                         |

|                  |      |                                                                         |
|------------------|------|-------------------------------------------------------------------------|
| Solyc10g045750.1 | 212  | NADH-ubiquinone oxidoreductase chain 4                                  |
| Solyc10g046770.2 | 148  | Trehalose-6-phosphate synthase, putative                                |
| Solyc10g046777.1 | 139  | Retrovirus-related Pol polyprotein from transposon 297                  |
| Solyc10g046840.1 | 179  | Starch synthase, chloroplastic/amyloplastic                             |
| Solyc10g046990.2 | 331  | Ribulose biphosphate carboxylase small chain, chloroplastic             |
| Solyc10g047030.3 | 164  | LEXYL1 protein                                                          |
| Solyc10g047410.1 | 214  | Photosystem II CP43 reaction center protein                             |
| Solyc10g047490.1 | 162  | Leucine-rich repeat receptor-like protein kinase family protein         |
| Solyc10g048060.1 | 168  | myosin XI D                                                             |
| Solyc10g048065.1 | 1668 | Transport membrane protein                                              |
| Solyc10g049300.2 | 160  | Glycine-rich protein A3                                                 |
| Solyc10g049360.2 | 147  | cyclin A3_6                                                             |
| Solyc10g049470.1 | 157  | Ycf1                                                                    |
| Solyc10g049590.1 | 255  | DNA-directed RNA polymerase subunit beta                                |
| Solyc10g049940.1 | 222  | Myb/SANT-like DNA-binding domain protein                                |
| Solyc10g052740.2 | 142  | Photosystem I P700 chlorophyll a apoprotein A1                          |
| Solyc10g052770.1 | 269  | DNA/RNA polymerases superfamily protein                                 |
| Solyc10g052775.1 | 168  | Retrovirus-related Pol polyprotein from transposon 297 family           |
| Solyc10g055020.2 | 146  | Mediator of RNA polymerase II transcription subunit 20-like protein     |
| Solyc10g076430.1 | 152  | Pectinesterase                                                          |
| Solyc10g077131.1 | 136  | Invertase/pectin methylesterase inhibitor family protein                |
| Solyc10g079750.2 | 144  | BTB/POZ ankyrin repeat protein                                          |
| Solyc10g080393.1 | 168  | 2-oxoglutarate (2OG) and Fe(II)-dependent oxygenase superfamily protein |
| Solyc11g012930.2 | 254  | WAT1-related protein                                                    |
| Solyc11g013130.2 | 154  | cysteine-rich/transmembrane domain protein A                            |
| Solyc11g013740.2 | 152  | Guanylate-binding family protein                                        |
| Solyc11g013790.2 | 148  | Tim10/DDP family zinc finger protein                                    |
| Solyc11g018700.2 | 172  | Ycf15 protein                                                           |
| Solyc11g020347.1 | 185  | Retrovirus-related Pol polyprotein from transposon TNT 1-94             |
| Solyc11g020353.1 | 141  | Adenylate isopentenyltransferase                                        |
| Solyc11g020490.2 | 262  | 40S ribosomal protein S27                                               |
| Solyc11g020785.1 | 159  | Retrovirus-related Pol polyprotein from transposon TNT 1-94             |
| Solyc11g021100.1 | 450  | NAD(P)H-quinone oxidoreductase subunit 2, chloroplastic                 |
| Solyc11g021120.1 | 448  | NAD(P)H-quinone oxidoreductase subunit 2, chloroplastic                 |
| Solyc11g021160.1 | 241  | Ycf68                                                                   |
| Solyc11g021180.1 | 185  | Ycf1                                                                    |
| Solyc11g021210.1 | 152  | Cytochrome c biogenesis protein CcsA                                    |
| Solyc11g021240.2 | 149  | Ycf1                                                                    |
| Solyc11g021270.1 | 169  | Ycf1                                                                    |
| Solyc11g021290.2 | 140  | Ycf1                                                                    |
| Solyc11g021300.1 | 154  | Ycf1                                                                    |
| Solyc11g022410.1 | 727  | Homeobox leucine zipper protein                                         |
| Solyc11g022530.2 | 166  | Late embryogenesis abundant protein (LEA) family protein                |

|                  |      |                                                                            |
|------------------|------|----------------------------------------------------------------------------|
| Solyc11g022610.2 | 148  | 30S ribosomal protein S4, chloroplastic                                    |
| Solyc11g050900.2 | 221  | Sulfotransferase                                                           |
| Solyc11g051005.1 | 178  | Pectinesterase                                                             |
| Solyc11g051035.1 | 338  | pre-mRNA-splicing factor of RES complex protein                            |
| Solyc11g051170.2 | 195  | ATP synthase subunit alpha, chloroplastic                                  |
| Solyc11g051200.1 | 165  | Senescence-associated protein                                              |
| Solyc11g027630.1 | 164  | glycosyl hydrolase 9A3                                                     |
| Solyc11g027640.1 | 160  | phosphatidylinositol 4-OH kinase beta1                                     |
| Solyc11g027645.1 | 171  | Ribosomal RNA small subunit methyltransferase B                            |
| Solyc11g027665.1 | 186  | Retrovirus-related Pol polyprotein from transposon 17.6                    |
| Solyc11g027690.1 | 192  | Flavin-binding kelch domain F box protein                                  |
| Solyc11g027693.1 | 144  | Retrovirus-related Pol polyprotein from transposon 17.6                    |
| Solyc11g027697.1 | 160  | Retrovirus-related Pol polyprotein from transposon 17.6                    |
| Solyc11g027760.1 | 164  | Cytochrome P450 like_TBP                                                   |
| Solyc11g027770.1 | 172  | Senescence-associated protein                                              |
| Solyc11g028123.1 | 473  | transmembrane protein                                                      |
| Solyc11g028127.1 | 297  | Retrovirus-related Pol polyprotein from transposon TNT 1-94                |
| Solyc11g028150.1 | 183  | Retrovirus-related Pol polyprotein from transposon TNT 1-94                |
| Solyc11g028160.1 | 173  | Cytochrome c biogenesis B                                                  |
| Solyc11g030570.1 | 339  | NADH-ubiquinone oxidoreductase chain 4                                     |
| Solyc11g030810.1 | 159  | Polynucleotidyl transferase, ribonuclease H-like superfamily protein       |
| Solyc11g030900.1 | 280  | Maturase-related protein                                                   |
| Solyc11g030903.1 | 847  | NADH-ubiquinone oxidoreductase chain 5                                     |
| Solyc11g045450.2 | 361  | B3 domain-containing protein family                                        |
| Solyc11g045440.1 | 297  | delta(3), delta(2)-enoyl CoA isomerase 1                                   |
| Solyc11g045430.1 | 226  | transmembrane protein                                                      |
| Solyc11g045150.1 | 205  | myosin XI D                                                                |
| Solyc11g044630.1 | 144  | Calcium-dependent protein kinase                                           |
| Solyc11g042650.1 | 251  | Target of Myb protein 1                                                    |
| Solyc11g039980.2 | 578  | ATP synthase subunit alpha                                                 |
| Solyc11g039970.1 | 752  | Retrovirus-related Pol polyprotein from transposon TNT 1-94                |
| Solyc11g039910.2 | 144  | Mitochondrial import inner membrane translocase subunit Tim17-like protein |
| Solyc11g039860.2 | 150  | Tetratricopeptide repeat (TPR)-like superfamily protein                    |
| Solyc11g039730.1 | 233  | NAD(P)H-quinone oxidoreductase subunit K, chloroplastic                    |
| Solyc11g039660.1 | 150  | Actin                                                                      |
| Solyc11g039640.2 | 203  | chromatin remodeling factor CHD3 (PICKLE)                                  |
| Solyc11g039390.1 | 1013 | calpain-type cysteine protease family                                      |
| Solyc11g039380.1 | 1553 | TRICHOME BIREFRINGENCE-LIKE 9                                              |
| Solyc11g039370.2 | 1584 | Glycosyl hydrolase superfamily protein                                     |
| Solyc11g039360.1 | 445  | Cytochrome c biogenesis FC                                                 |
| Solyc11g039350.1 | 277  | mitochondrial editing factor 19                                            |
| Solyc11g038350.1 | 1281 | Pentatricopeptide repeat (PPR) superfamily protein                         |
| Solyc11g038340.1 | 3163 | Nuclear control of ATP synthase 2                                          |

|                  |      |                                                                     |
|------------------|------|---------------------------------------------------------------------|
| Solyc11g056250.1 | 138  | glutamine-dependent asparagine synthase 1                           |
| Solyc11g056270.2 | 267  | Maturase                                                            |
| Solyc11g056280.1 | 384  | 1,2-alpha-L-fucosidase                                              |
| Solyc11g056290.2 | 1274 | DNA-directed RNA polymerase                                         |
| Solyc11g056310.1 | 1132 | Ribosomal protein S13                                               |
| Solyc11g056330.1 | 818  | cysteine-rich RLK (RECEPTOR-like protein kinase) 19                 |
| Solyc11g056340.1 | 799  | Photosystem II protein D1                                           |
| Solyc11g056350.1 | 1499 | RHOMBOID-like protein 4                                             |
| Solyc11g056360.2 | 1043 | Ribosomal protein S12                                               |
| Solyc11g056380.1 | 1396 | Protein transport protein sec23, putative                           |
| Solyc11g056390.1 | 517  | 30S ribosomal protein S7, chloroplastic                             |
| Solyc11g056400.2 | 720  | Ribosomal protein S3                                                |
| Solyc11g056410.2 | 277  | Cytochrome c oxidase subunit 2                                      |
| Solyc11g056440.1 | 1517 | ureide permease 2                                                   |
| Solyc11g056460.1 | 480  | Retrovirus-related Pol polyprotein from transposon TNT 1-94         |
| Solyc11g056470.2 | 655  | RING/U-box superfamily protein                                      |
| Solyc11g056500.2 | 436  | OR338                                                               |
| Solyc11g056510.1 | 998  | Ribonuclease H                                                      |
| Solyc11g056530.1 | 443  | RNA-directed DNA polymerase (Reverse transcriptase)                 |
| Solyc11g061980.1 | 1402 | Glycosyltransferase                                                 |
| Solyc11g062070.2 | 153  | Outer envelope protein 80, chloroplastic                            |
| Solyc11g062350.2 | 295  | Blue copper protein                                                 |
| Solyc11g063480.1 | 294  | delta(3), delta(2)-enoyl CoA isomerase 1                            |
| Solyc11g063490.1 | 155  | Glucose-6-phosphate isomerase, cytosolic 1                          |
| Solyc11g063500.1 | 447  | nitrite reductase 1                                                 |
| Solyc11g063520.1 | 573  | sequence-specific DNA binding transcription factor ATNDX            |
| Solyc11g063540.1 | 369  | Photosystem II CP43 reaction center protein                         |
| Solyc11g063570.1 | 143  | F-box/RNI-like superfamily protein                                  |
| Solyc11g063580.2 | 274  | Photosystem II stability/assembly factor HCF136, chloroplastic      |
| Solyc11g063600.2 | 628  | Cytochrome c oxidase subunit 1                                      |
| Solyc11g063620.2 | 262  | Cytochrome c biogenesis FN                                          |
| Solyc11g063640.1 | 662  | Maturase K                                                          |
| Solyc11g063650.1 | 183  | Adenylate isopentenyltransferase                                    |
| Solyc11g063740.2 | 162  | Adenylate isopentenyltransferase                                    |
| Solyc11g064940.1 | 159  | AMP-dependent synthetase and ligase family protein                  |
| Solyc11g065360.2 | 275  | ABC transporter G family member 15                                  |
| Solyc11g069020.2 | 157  | Disease resistance protein                                          |
| Solyc12g006350.2 | 344  | Auxin response factor                                               |
| Solyc12g006860.2 | 187  | brassinosteroid hydroxylase                                         |
| Solyc12g008890.2 | 181  | Cytokinin oxidase/dehydrogenase-like                                |
| Solyc12g011460.1 | 527  | Cyclophilin-like peptidyl-prolyl cis-trans isomerase family protein |
| Solyc12g014320.2 | 216  | Anaphase-promoting complex subunit 6-like protein                   |
| Solyc12g014600.2 | 238  | RNA-binding protein, putative                                       |
| Solyc12g016125.1 | 267  | Protein kinase                                                      |

|                  |     |                                                                      |
|------------------|-----|----------------------------------------------------------------------|
| Solyc12g017700.2 | 138 | ATP-dependent RNA helicase                                           |
| Solyc12g017750.2 | 160 | pentatricopeptide (PPR) repeat-containing protein                    |
| Solyc12g017885.1 | 466 | DNA-directed RNA polymerases II and IV subunit 5A                    |
| Solyc12g019627.1 | 150 | Cytochrome P450                                                      |
| Solyc12g019940.1 | 148 | Polyprotein                                                          |
| Solyc12g021360.2 | 743 | Protein apaG                                                         |
| Solyc12g082700.1 | 188 | ABC(ABCB) family transporter: mitochondrial ATM1-like protein (ABCB) |
| Solyc12g082790.1 | 137 | Bifunctional dihydroflavonol 4-reductase/flavanone 4-reductase       |
| Solyc12g077540.2 | 138 | Trihelix transcription factor GT-1                                   |
| Solyc12g077546.1 | 143 | Retrovirus-related Pol polyprotein from transposon TNT 1-94          |
| Solyc12g026400.2 | 136 | Protease Do-like 9                                                   |
| Solyc12g027550.1 | 196 | Photosystem II CP43 reaction center protein                          |
| Solyc12g027753.1 | 265 | Ribosomal protein S12                                                |
| Solyc12g027765.1 | 152 | Retrotransposon protein, putative, Ty3-gypsy subclass                |
| Solyc12g027815.1 | 144 | Retrovirus-related Pol polyprotein from transposon 17.6              |
| Solyc12g027820.1 | 191 | NAD(P)H-quinone oxidoreductase subunit 2, chloroplastic              |
| Solyc12g070100.2 | 146 | Mediator of RNA polymerase II transcription subunit 25               |
| Solyc12g070220.2 | 181 | Protein Ycf2                                                         |
| Solyc12g070270.2 | 149 | ABC transporter B family protein                                     |
| Solyc12g062450.2 | 154 | DNA repair metallo-beta-lactamase family protein                     |
| Solyc12g062470.2 | 386 | Protein Ycf2                                                         |
| Solyc12g062480.2 | 191 | conserved telomere maintenance component 1                           |
| Solyc12g062530.2 | 167 | ATP synthase beta subunit                                            |
| Solyc12g062810.1 | 179 | glucose-6-phosphate/phosphate translocator 2                         |
| Solyc12g063010.2 | 225 | ARID/BRIGHT DNA-binding domain-containing protein                    |
| Solyc12g032990.2 | 301 | Photosystem I P700 chlorophyll a apoprotein A2                       |
| Solyc12g033030.1 | 185 | 50S ribosomal protein L23, chloroplastic                             |
| Solyc12g033090.2 | 201 | 50S ribosomal protein L23, chloroplastic                             |
| Solyc12g035475.1 | 203 | Endoplasmic reticulum metalloproteinase 1                            |
| Solyc12g035524.1 | 155 | Retrovirus-related Pol polyprotein from transposon TNT 1-94          |
| Solyc12g035550.1 | 330 | Ycf1                                                                 |
| Solyc12g035620.2 | 354 | Holliday junction resolvase-like protein                             |
| Solyc12g035670.2 | 139 | SAC3/GANP/Nin1/mts3/eIF-3 p25 family                                 |
| Solyc12g035826.1 | 581 | Cytochrome c biogenesis C                                            |
| Solyc12g035828.1 | 164 | 50S ribosomal protein L23, chloroplastic                             |
| Solyc12g035860.1 | 163 | 30S ribosomal protein S11, chloroplastic                             |
| Solyc12g035865.1 | 263 | ARF GAP-like zinc finger-containing protein ZIGA4                    |
| Solyc12g035870.2 | 139 | DNA-directed RNA polymerase subunit beta                             |
| Solyc12g035875.1 | 157 | 30S ribosomal protein S3, chloroplastic                              |
| Solyc12g035920.1 | 166 | NADH-ubiquinone oxidoreductase chain 6                               |
| Solyc12g035930.1 | 153 | DNA-directed RNA polymerase subunit beta                             |
| Solyc12g036350.1 | 157 | nudix hydrolase homolog 10                                           |
| Solyc12g036415.1 | 156 | SAUR-like auxin-responsive protein family                            |

|                  |     |                                                |
|------------------|-----|------------------------------------------------|
| Solyc12g036550.2 | 138 | Ycf1                                           |
| Solyc12g036640.1 | 146 | Extracellular calcium sensing receptor         |
| Solyc12g036677.1 | 164 | Cytochrome P450                                |
| Solyc12g036710.2 | 195 | RNA polymerase subunit                         |
| Solyc12g036720.1 | 143 | Maturase                                       |
| Solyc12g036870.2 | 224 | Myb/SANT-like DNA-binding domain protein       |
| Solyc12g037940.2 | 194 | DNA-directed RNA polymerase subunit beta       |
| Solyc12g038000.2 | 179 | Peptidyl-prolyl cis-trans isomerase            |
| Solyc12g038657.1 | 138 | Protein FAR1-RELATED SEQUENCE 5                |
| Solyc12g042230.2 | 283 | ATP synthase subunit beta, chloroplastic       |
| Solyc12g044440.2 | 171 | Zinc finger protein                            |
| Solyc12g044850.2 | 352 | WAS/WASL-interacting family protein            |
| Solyc12g088410.2 | 378 | Glycosyl hydrolase family 35 protein, putative |
| Solyc12g088540.2 | 252 | WD40 repeat-like protein                       |
| Solyc12g098100.2 | 201 | Non-specific serine/threonine protein kinase   |

---
